# Supplementary material for: Highly sensitive and selective detection of triphosgene with a 2-(2′-hydroxyphenyl)benzimidazole derived fluorescent probe
Source: Royal Society of Chemistry journal article supplement (doi:10.1039/d3ra06061f), 2023-01-01
Supplement: d3ra06061f1.pdf [file d3ra06061f1.pdf]

## Supporting information

### Highly sensitive and selective detection of triphosgene with a 2-(2'-hydroxyphenyl)benzimidazole derived fluorescent probe

Wen-Zhu Bi,<sup>\*ab</sup> Yang Geng,<sup>c</sup> Wen-Jie Zhang,<sup>a</sup> Chen-Yu Li,<sup>a</sup> Chu-Sen Ni,<sup>a</sup> Qiu-Juan Ma,<sup>\*ab</sup> Su-Xiang Feng,<sup>\*bde</sup> Xiao-Lan Chen<sup>f</sup> and Ling-Bo Qu<sup>f</sup>

<sup>a</sup> School of Pharmacy, Henan University of Chinese Medicine, Zhengzhou, China, 450046. E-mail: biwenzhu2018@hactcm.edu.cn; maqiujuan104@126.com

<sup>b</sup> Henan Engineering Research Center of Modern Chinese Medicine Research, Development and Application, Zhengzhou, China, 450046. E-mail: fengsx221@163.com

<sup>c</sup> Department of Pharmacy, Zhengzhou Railway Vocational and Technical College, Zhengzhou, China, 450046.

<sup>d</sup> Academy of Chinese Medical Sciences, Henan University of Chinese Medicine, Zhengzhou, China, 450046

<sup>e</sup> Collaborative Innovation Center for Chinese Medicine and Respiratory Diseases co-constructed by Henan province & Education Ministry of P. R. China, Zhengzhou, China, 450046

<sup>f</sup> College of Chemistry, Zhengzhou University, Zhengzhou, China, 450052

## Contents

|                                                                                                         |    |
|---------------------------------------------------------------------------------------------------------|----|
| 1. Optimization of triethylamine for the generation of phosgene.....                                    | S2 |
| 2. Investigation of the effect of solvents.....                                                         | S2 |
| 3. Measurement of the fluorescence quantum yield.....                                                   | S3 |
| 4. Measurement of the LoD for <b>4-AHBI</b> .....                                                       | S3 |
| 5. Fluorescence spectra of <b>4-AHBI</b> with triphosgene in the presence of interfering compounds..... | S4 |
| 6. <b>Table S1</b> Determination of triphosgene in the presence of interfering compounds.....           | S4 |
| 7. Exploration of the sensing mechanism.....                                                            | S4 |
| 8. <sup>1</sup> H NMR, <sup>13</sup> C NMR and HRMS copies of <b>4-AHBI</b> .....                       | S7 |

## 1. Optimization of triethylamine for the generation of phosgene

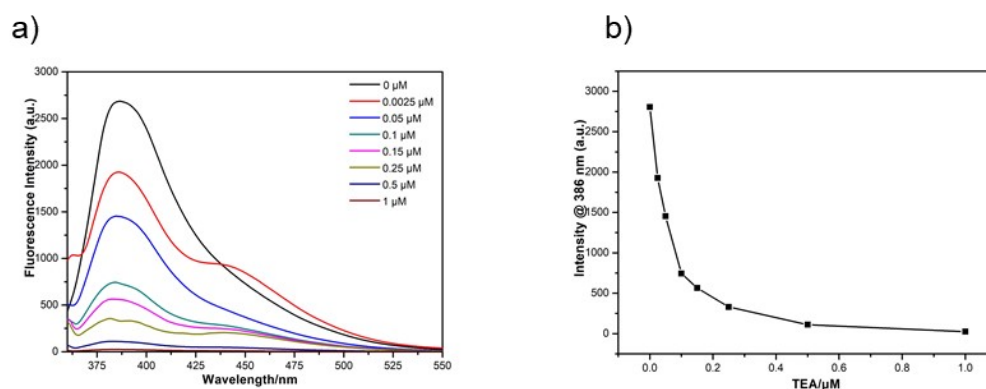

**Figure S1** a) Fluorescence spectra of 10  $\mu\text{M}$  4-AHBI solutions containing triethylamine (TEA) (0-1  $\mu\text{M}$ ) upon addition of triphosgene (3.5  $\mu\text{M}$ ),  $\lambda_{\text{exc}} = 357$  nm, slit width = 2.5/2.5 nm; b) Fluorescence intensities @386 nm vs concentration of TEA.

## 2. Investigation of the effect of solvents

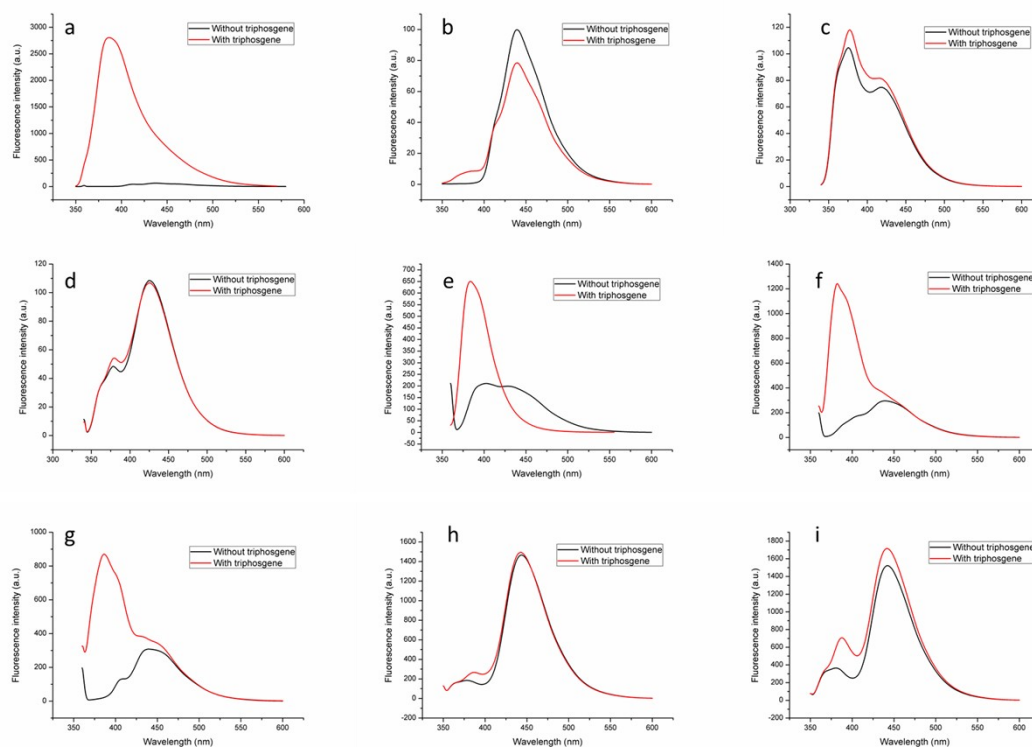

**Figure S2** The fluorescence spectra of 4-AHBI (10  $\mu\text{M}$ ) in different solvents without (black) and with (red) triphosgene (3.5  $\mu\text{M}$ ). a:  $\text{CH}_2\text{Cl}_2$  ( $\lambda_{\text{exc}} = 357$  nm,  $\lambda_{\text{em}} = 386$  nm), b:  $\text{CHCl}_3$  ( $\lambda_{\text{exc}} = 343$  nm,  $\lambda_{\text{em}} = 440$  nm), c: MeOH ( $\lambda_{\text{exc}} = 330$  nm,  $\lambda_{\text{em}} = 377$  nm), d: EtOH ( $\lambda_{\text{exc}} = 339$  nm,  $\lambda_{\text{em}} = 425$  nm), e: MeCN ( $\lambda_{\text{exc}} = 357$  nm,  $\lambda_{\text{em}} = 386$  nm), f: acetone ( $\lambda_{\text{exc}} = 357$  nm,  $\lambda_{\text{em}} = 383$  nm), g: EtOAc ( $\lambda_{\text{exc}} = 357$  nm,  $\lambda_{\text{em}} = 386$  nm), h: DMF ( $\lambda_{\text{exc}} = 346$  nm,  $\lambda_{\text{em}} = 444$  nm), i: DMSO ( $\lambda_{\text{exc}} = 346$  nm,  $\lambda_{\text{em}} = 441$  nm). Slit width = 2.5/2.5 nm.

### 3. Measurement of the fluorescence quantum yield

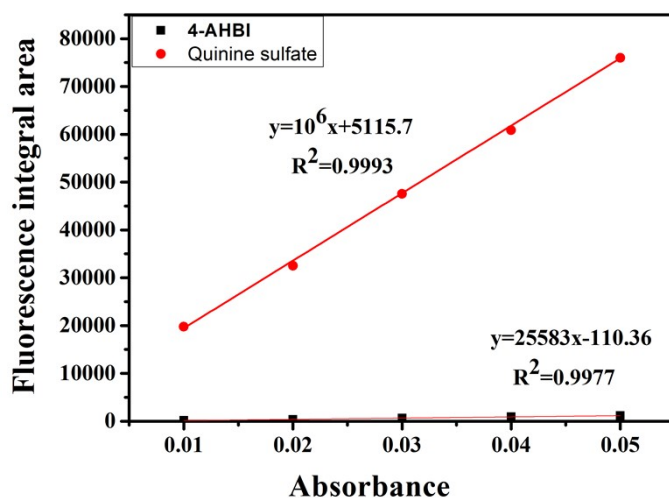

**Figure S3** Measurement of the fluorescence quantum yields ( $\Phi_f$ ) of **4-AHBI**. **4-AHBI** were determined in  $\text{CH}_2\text{Cl}_2$  with solvent refractive index correction. Quinine sulfate in 1.0 M  $\text{H}_2\text{SO}_4$  was used as the reference ( $\Phi = 54\%$ ) at an excitation wavelength of 340 nm. The fluorescence quantum yield was calculated by the following equation:  $\Phi_x = \Phi_s (F_x/F_s)(A_s/A_x)(n_x/n_s)^2$ . Where x and s indicate the **4-AHBI** and quinine sulfate, respectively, F is the area of the fluorescence peak, A is the optical density at the excitation wavelength and n is the refractive index of the solvent.

### 4. Measurement of the LoD for 4-AHBI

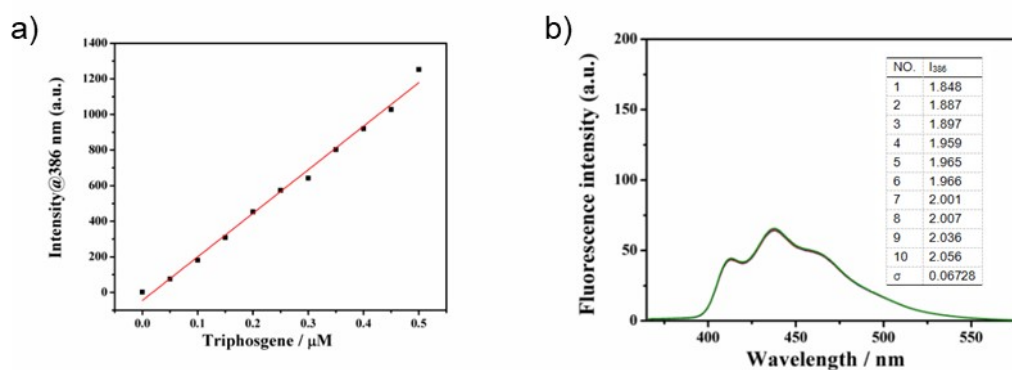

**Figure S4** Measurement of the LoD for **4-AHBI** to triphosgene. a) The emission intensities at 386 nm vs triphosgene concentration. Equation:  $y = 2416.7x - 40.195$ ,  $R^2 = 0.9948$ ; b) Ten times of the blank experiment to evaluate the standard deviation  $\sigma$  (0.06728). The triphosgene detection limit was determined to be 0.08 nM ( $\text{LoD} = 3\sigma/k$ , where  $\sigma$  is the standard deviation of the blank experiment, and k is the slope of the relationship between the emission intensities and triphosgene concentration).

## 5. Fluorescence spectra of 4-AHBI with triphosgene in the presence of interfering compounds

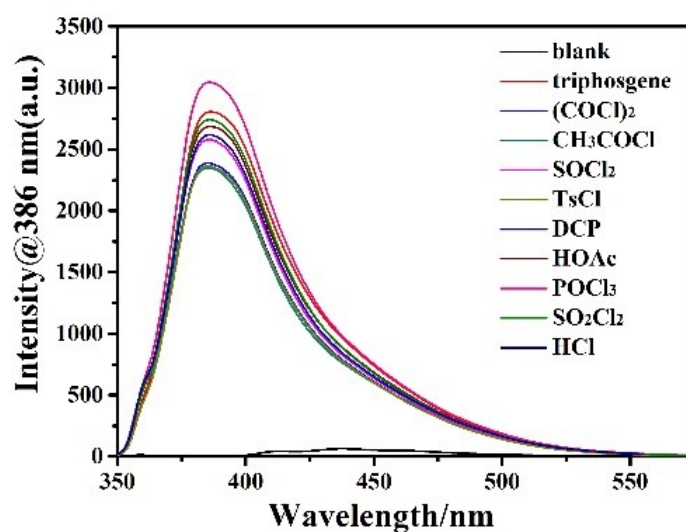

**Figure S5** Fluorescence spectra of **4-AHBI** (10  $\mu\text{M}$ ) in  $\text{CH}_2\text{Cl}_2$  with triphosgene (3.5  $\mu\text{M}$ ) in the presence of various analytes (5  $\mu\text{M}$ ).  $\lambda_{\text{exc}} = 357 \text{ nm}$ .

## 6. Table S1 Determination of triphosgene in the presence of interfering compounds

| Interferents compounds (5 $\mu\text{M}$ ) | Triphosgene added ( $\mu\text{M}$ ) | Triphosgene found ( $\mu\text{M}$ ) | Recovery |
|-------------------------------------------|-------------------------------------|-------------------------------------|----------|
| $(\text{COCl})_2$                         | 3.5                                 | 2.8                                 | 80.1%    |
| $\text{CH}_3\text{COCl}$                  | 3.5                                 | 2.7                                 | 77.1%    |
| $\text{SOCl}_2$                           | 3.5                                 | 3.1                                 | 88.6%    |
| TsCl                                      | 3.5                                 | 2.8                                 | 79.6%    |
| DCP                                       | 3.5                                 | 3.1                                 | 88.6%    |
| HOAc                                      | 3.5                                 | 3.2                                 | 91.4%    |
| $\text{POCl}_3$                           | 3.5                                 | 3.9                                 | 111.4%   |
| $\text{SO}_2\text{Cl}_2$                  | 3.5                                 | 3.0                                 | 84.3%    |
| HCl                                       | 3.5                                 | 3.1                                 | 88.6%    |

## 7. Exploration of the sensing mechanism

The reaction mixture was analysed by HPLC with a High-resolution mass spectra (HRMS) on Agilent Technologies 6530 Accurate mass Q-TOF LC/MS using ESI as ion source. A minor peak at 1.959 min corresponded with the remnant **4-AHBI** (HRMS:  $[\text{M}+\text{H}]^+$ : calcd for  $\text{C}_{13}\text{H}_{12}\text{N}_3\text{O}$ : 226.0975, found: 226.0975.). A major peak at 3.812 min was obviously obtained and the HRMS spectrum showed the  $m/z$  252.0776, which should be the single sensing product **4-AHBI-CO** (for  $\text{C}_{14}\text{H}_{10}\text{N}_3\text{O}_2$ :  $\text{M}+\text{H}^+$ : calculated 252.0768).

The sensing product **4-AHBI-CO** was synthesized as follows: **4-AHBI** (0.113 g, 0.5 mmol) was stirred and dissolved in dry  $\text{CH}_2\text{Cl}_2$  (25 mL) at 0  $^\circ\text{C}$ , then triphosgene (0.15 g,

0.5 mmol) in dry  $\text{CH}_2\text{Cl}_2$  (10 mL) was added over a period of 10 min. Then the mixture was continually stirred at 0 °C until the completion of the reaction. Saturated  $\text{NaHCO}_3$  aqueous solution was added into the mixture and extracted with  $\text{CH}_2\text{Cl}_2$  (20 mL  $\times$  2). The organic phase was collected, dried over anhydrous  $\text{Na}_2\text{SO}_4$  and evaporated to give the crude product. The crude product was further purified by column chromatography (ethyl acetate : petroleum ether = 1 : 5) to give the sensing product (0.096 g, yield 78%) as a white solid.

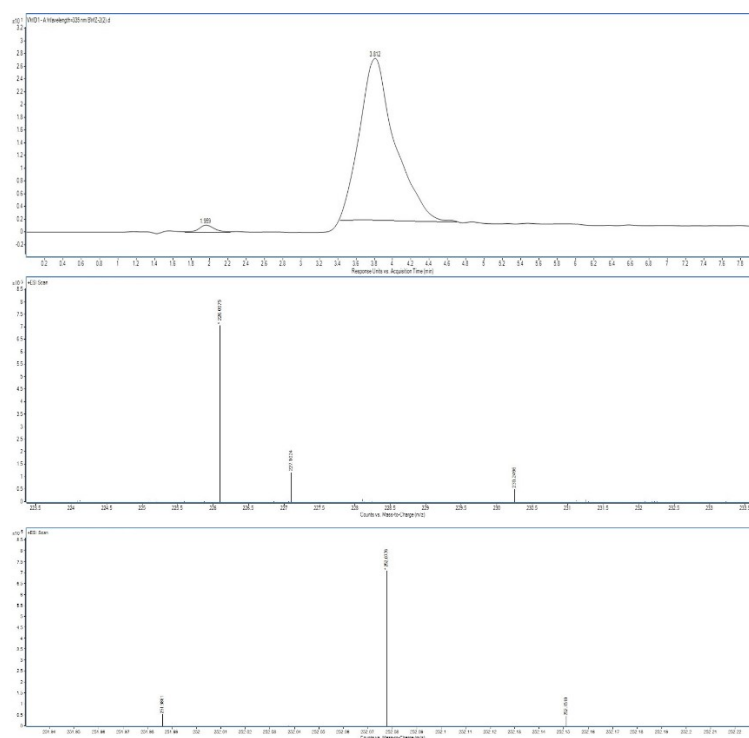

**Figure S6** HPLC chromatogram of the reaction mixture (up) and HRMS spectrum of the peak at 1.959 min (middle) and 3.812 min (down).

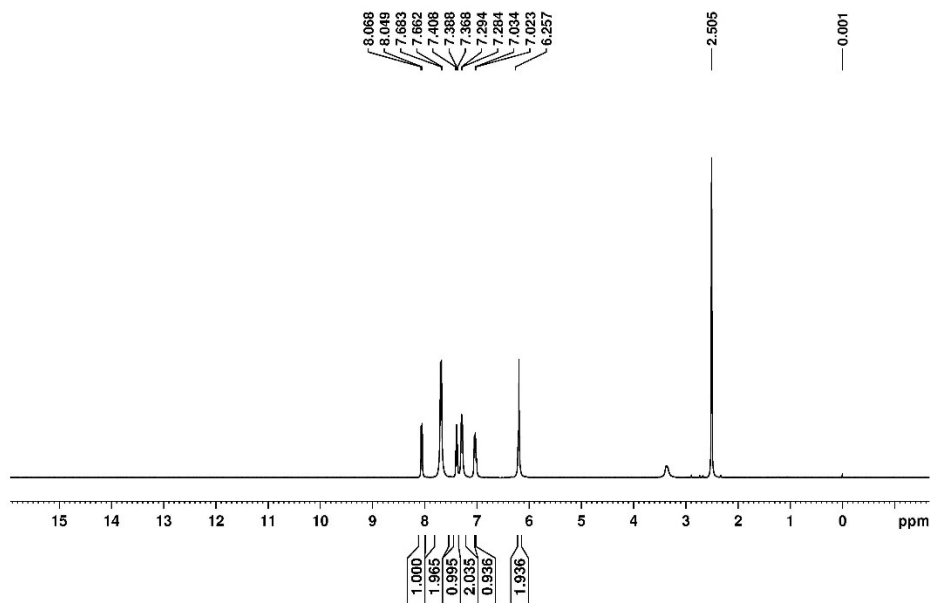

Figure S7 <sup>1</sup>H NMR of 4-AHBI-CO.

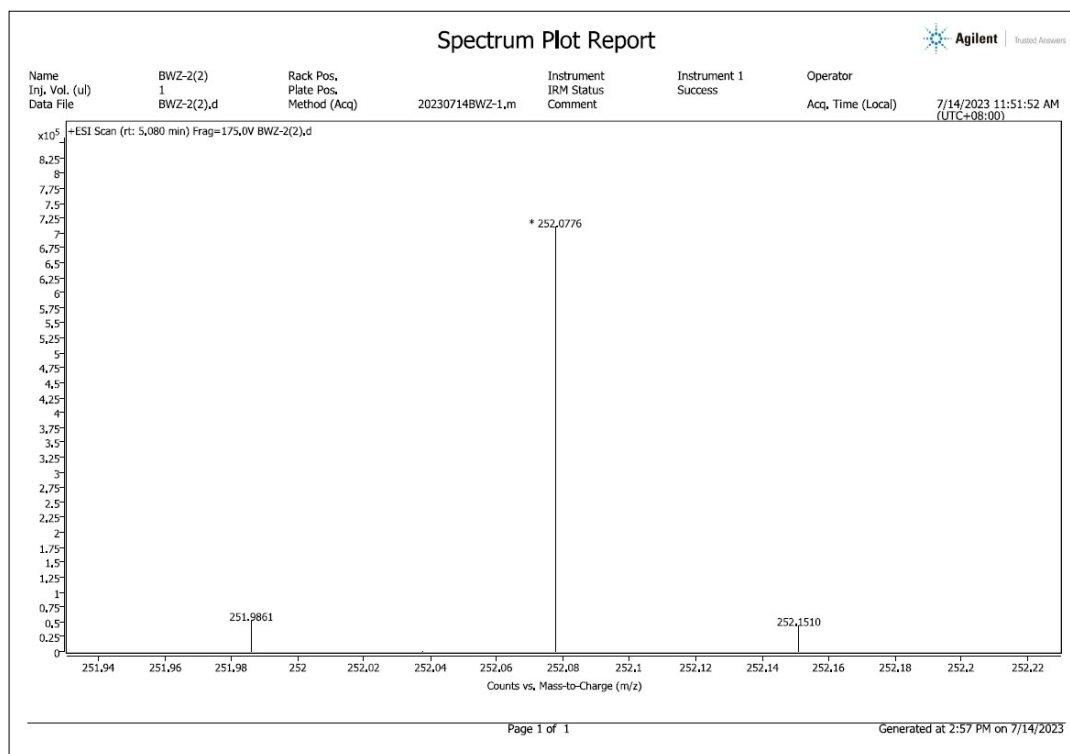

Figure S8 HRMS copy of 4-AHBI-CO.

## 8. <sup>1</sup>H NMR, <sup>13</sup>C NMR and HRMS copies of 4-AHBI

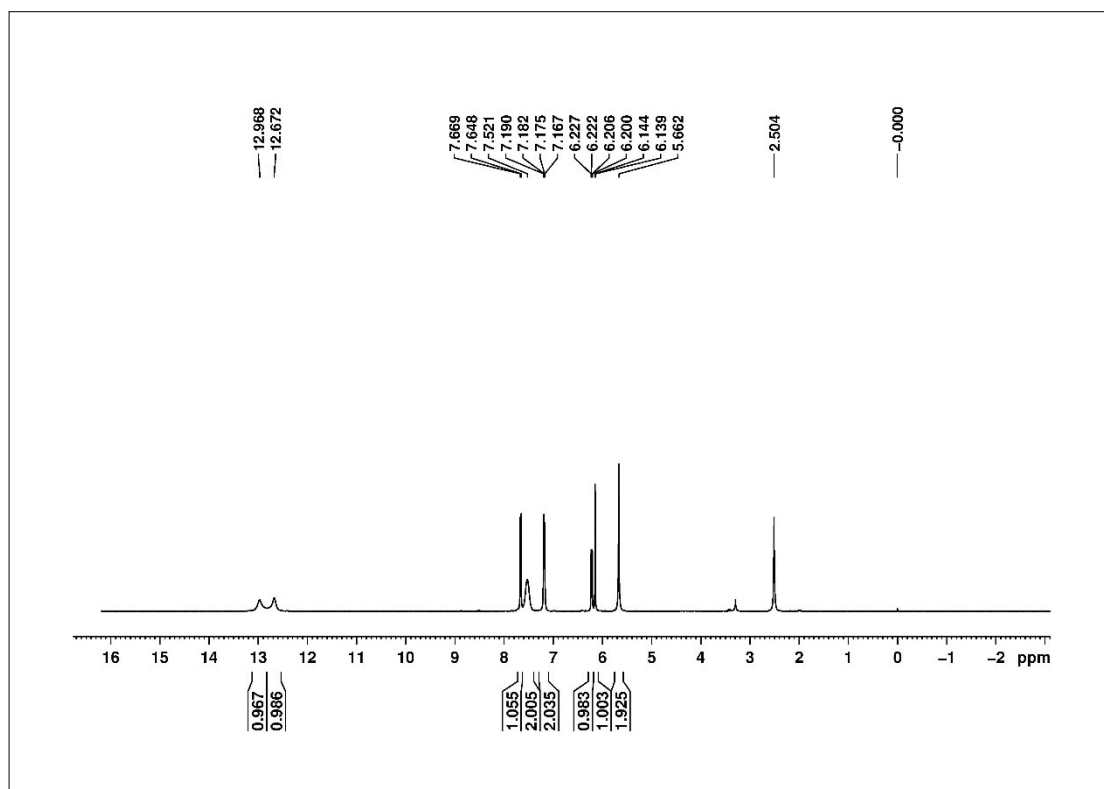

Figure S9 <sup>1</sup>H NMR copy of 4-AHBI

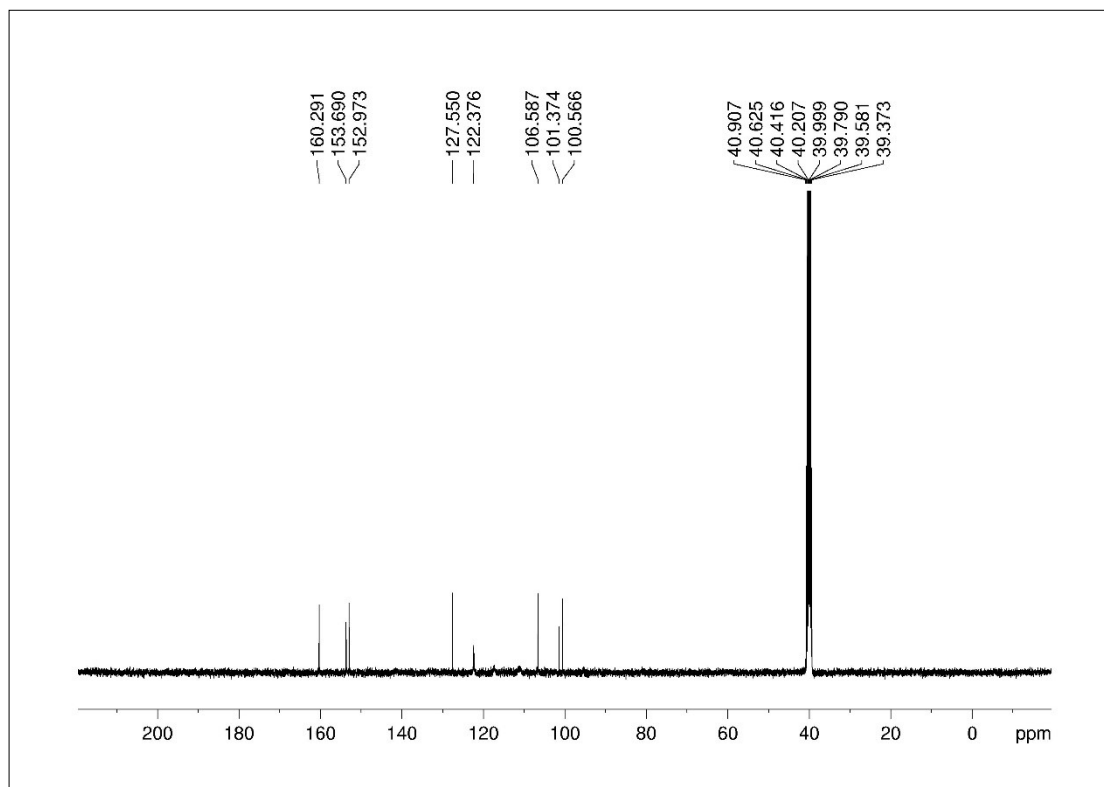

Figure S10 <sup>13</sup>C NMR copy of 4-AHBI

# Spectrum Plot Report

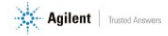

|                |         |              |                 |              |                                   |
|----------------|---------|--------------|-----------------|--------------|-----------------------------------|
| Name           | BWZ-2   | Rack Pos.    | Instrument      | Instrument 1 | Operator                          |
| Inj. Vol. (ul) | 1       | Plate Pos.   | IRM Status      | Success      |                                   |
| Data File      | BWZ-2.d | Method (Acq) | 20230714BWZ-1.m | Comment      | Acq. Time (Local)                 |
|                |         |              |                 |              | 7/14/2023 11:08:46 AM (UTC+08:00) |

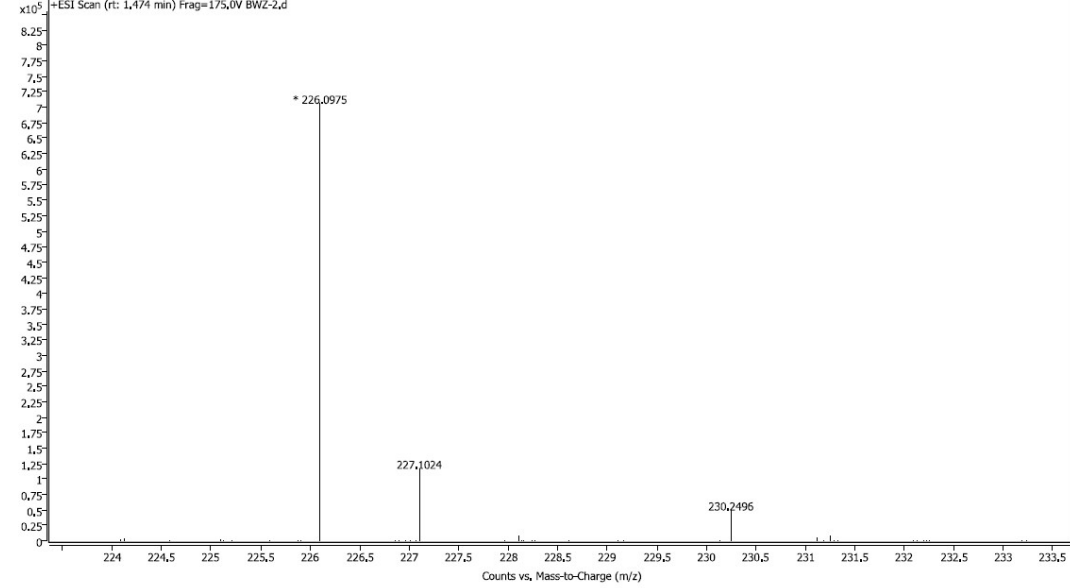

**Figure S11 HRMS copy of 4-AHBI**
